# Supplementary material for: Patients at high risk for a severe clinical course of COVID-19 — small-area data in support of vaccination and other population-based interventions in Germany
Source: Springer Nature journal article supplement (doi:10.1186/s12889-021-11735-3), 2021-09-28
Supplement: MOESM2 [file 19706188]

Number of patients at risk (in thousand)

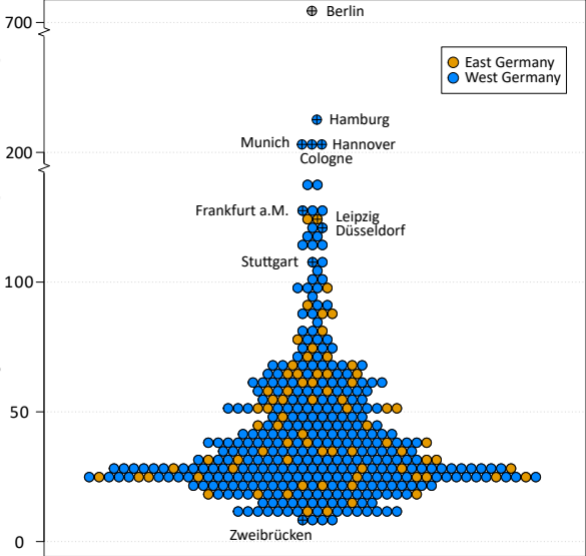

Districts
